# Supplementary material for: Evidence of intramolecular electron transfer between two metallic atoms in a bimetallic complex by electrochemical methods
Source: Royal Society of Chemistry journal article supplement (doi:10.1039/b507665j), 2005-01-01
Supplement: b507665j.pdf [file b507665j.pdf]

## Supplementary data

### Evidence of intramolecular electron transfer between two metallic atoms in a bimetallic complex by electrochemical methods

Hélène Cattey,\* Alain Vallat, Pierre Le Gendre, David Evrard, Claude Moïse and Yves Mugnier

*Laboratoire de Synthèse et Electrosynthèse Organométalliques LSEO-UMR 5188, Université de Bourgogne, Faculté des Sciences Mirande, 9, Allée Alain Savary 21000 Dijon, France. Fax: 33 380 39 6091; Tel : 33 380 39 3665. E-mail : hcattey@u-bourgogne.fr*

The ESR spectra were acquired on a Bruker ESP 300 instrument at 295K, in the electrochemical study conditions (THF,  $\text{NBU}_4\text{PF}_6$  :  $0.2 \text{ mol.L}^{-1}$ , studied complex :  $\cong 2 \cdot 10^{-3} \text{ mol.L}^{-1}$ ).

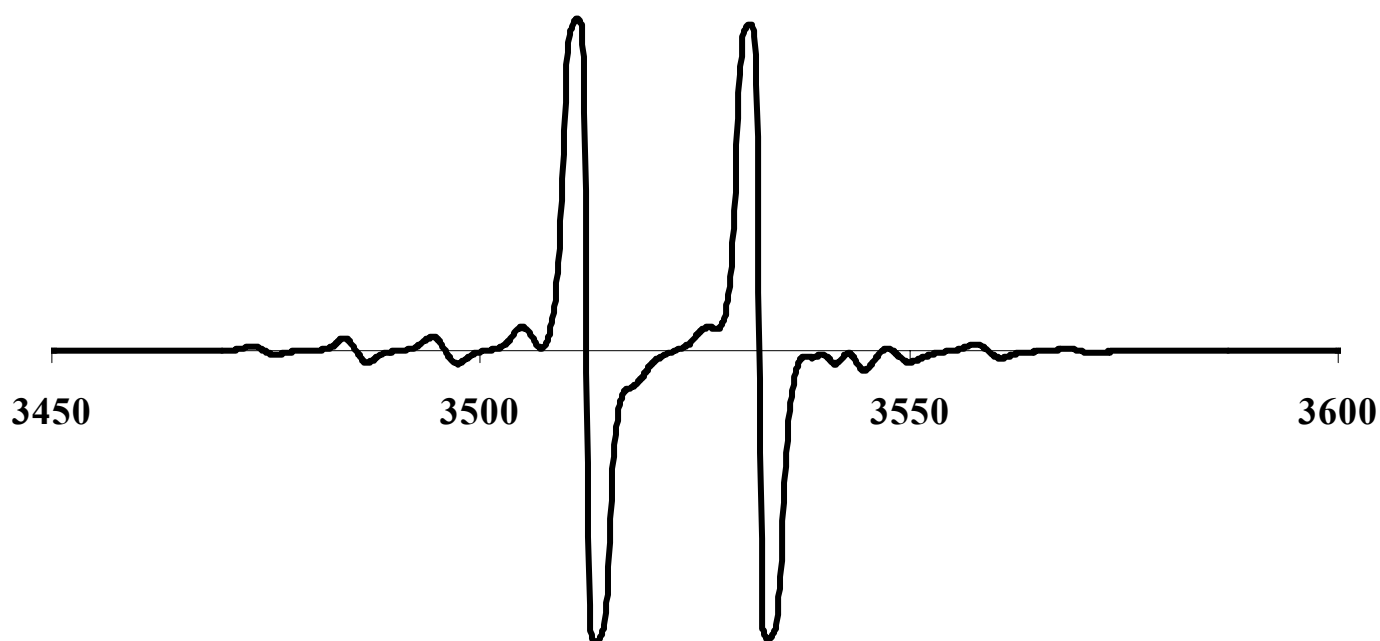

**Fig. 1S** ESR spectrum of complex 1' :  $g = 1.9896$  ;  $a_p = 19.8 \text{ G}$  ;  $a_{Ti} = 9.3 \text{ G}$

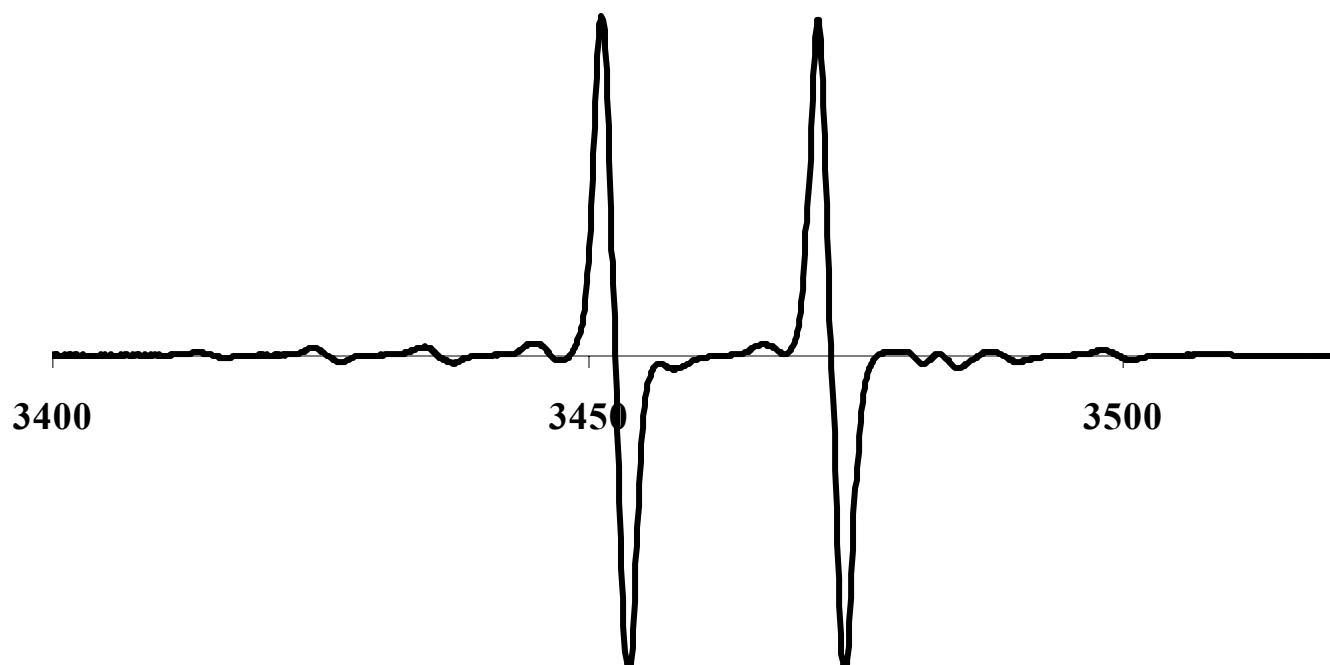

**Fig. 2S** ESR spectrum of complex 3' :  $g = 1.9885$  ;  $a_p = 20$  G ;  $a_{Ti} = 10$  G
